# Supplementary material for: Mapping species distributions: A comparison of skilled naturalist and lay citizen science recording
Source: PubMed Central journal article supplement (PMC4623864; doi:10.1007/s13280-015-0709-x), 2015-10-27
Supplement: 13280_2015_709_MOESM1_ESM.pdf [file 13280_2015_709_MOESM1_ESM.pdf]

***Ambio***

Electronic supplementary material

Title: **Mapping species distributions: A comparison of skilled naturalist and lay citizen science recording**

Authors: René van der Wal, Helen Anderson, Annie Robinson, Nirwan Sharma, Chris Mellish, Stuart Roberts, Ben Darvill and Advait Siddharthan

**Table S1** Numbers of common carder (*Bombus pascuorum*) records provided to the UK national repository (National Biodiversity Network) by the respective recording schemes and societies for three time periods. Comparing the years 2002/03 and 2011/12 shows changes in the volume of 'naturalist records' within and between organisations, whilst comparing 2011/12 and 2013/14 highlights the issue of timeliness of data provision. Data were downloaded from the NBN Gateway on 25/2/2015.

\*Providers from which data were requested directly (as not downloadable from the gateway) and thus more likely to be up-to-date

| Organisation                                                  | 2002/03     | 2011/12     | 2013/14     |
|---------------------------------------------------------------|-------------|-------------|-------------|
| Bees, Wasps and Ants Recording Society                        | 2224        | 710         | 24          |
| Highland Biological Recording Group                           | 330         | 53          | 26          |
| Sussex Biodiversity Records Centre                            | 191         | 274         | 118 *       |
| Natural Resources Wales                                       | 140         | 0           | 0           |
| Cheshire RECORD                                               | 120         | 249         | 250         |
| Suffolk Biological Records Centre                             | 120         | 31          | 24          |
| Rotherham Biological Records Centre                           | 118         | 10          | 13          |
| Essex Field Club                                              | 117         | 90          | 90 *        |
| NE Scotland Biological Records Centre                         | 93          | 11          | 0           |
| Worcestershire Biological Records Centre                      | 86          | 136         | 113         |
| Environmental Records Information Centre North East           | 85          | 188         | 49          |
| National Trust                                                | 74          | 39          | 7           |
| Greenspace Information for Greater London                     | 56          | 28          | 81 *        |
| Bristol Regional Environmental Records Centre                 | 51          | 54          | 11          |
| Birmingham EcoRecord                                          | 22          | 0           | 0           |
| West Wales Biodiversity Information Centre                    | 16          | 0           | 0           |
| Shropshire Ecological Data Network                            | 15          | 93          | 26          |
| Norfolk Biodiversity Information Service                      | 14          | 179         | 30          |
| South East Wales Biodiversity Records Centre                  | 14          | 0           | 0           |
| Gloucestershire Centre for Environmental Records              | 12          | 0           | 2           |
| Surrey Biodiversity Information Centre                        | 12          | 0           | 0           |
| Cumbria Biodiversity Data Centre                              | 11          | 29          | 46 *        |
| Scottish Wildlife Trust                                       | 10          | 38          | 6           |
| Natural England                                               | 7           | 0           | 0           |
| Merseyside Biobank                                            | 6           | 81          | 88          |
| Thames Valley Environmental Records Centre                    | 6           | 4           | 0           |
| Sheffield Biological Records Centre                           | 3           | 38          | 21          |
| Staffordshire Ecological Record                               | 3           | 36          | 4           |
| Wiltshire and Swindon Biological Records Centre               | 3           | 19          | 8           |
| Bedfordshire and Luton Biodiversity Recording and Mon. Centre | 2           | 533         | 285         |
| Devon Biodiversity Records Centre                             | 2           | 0           | 0           |
| Herefordshire Biological Records Centre                       | 2           | 26          | 7           |
| Lancashire Environmental Record Network                       | 2           | 45          | 67          |
| The Wildlife Information Centre                               | 2           | 4           | 0           |
| Derbyshire Wildlife Trust                                     | 1           | 0           | 0           |
| National Trust for Scotland                                   | 1           | 3           | 13          |
| Royal Horticultural Society                                   | 1           | 0           | 0           |
| Tullie House Museum                                           | 1           | 0           | 0           |
| Yorkshire Wildlife Trust                                      | 1           | 5           | 3           |
| Buglife - The Invertebrate Conservation Trust                 | 0           | 42          | 53          |
| Cambridgeshire & Peterborough Environmental Records Centre    | 0           | 2           | 0           |
| Fife Nature Records Centre                                    | 0           | 0           | 1           |
| Herts Environmental Records Centre                            | 0           | 7           | 11          |
| Lorn Natural History Group                                    | 0           | 59          | 3           |
| North & East Yorkshire Ecological Data Centre                 | 0           | 0           | 3           |
| Open Mosaic Habitat Survey Group                              | 0           | 148         | 0           |
| <b>TOTAL</b>                                                  | <b>3974</b> | <b>3264</b> | <b>1483</b> |

**Table S2** Numbers of tree bumblebee (*Bombus hypnorum*) records provided to the UK national repository (National Biodiversity Network) by the respective recording schemes and societies for three time periods. Comparing the first nine years of NBN records of this species in the UK (2002/10) with 2011/12 shows changes in the volume of ‘naturalist records’ within and between organisations, whilst comparing 2011/12 and 2013/14 highlights the issue of timeliness of data provision. Data were downloaded from the NBN Gateway on 25/2/2015. \*Providers from which data were requested directly (as not downloadable from the gateway) and thus more likely to be up-to-date

| Organisation                                                  | 2002/10     | 2011/12     | 2013/14    |
|---------------------------------------------------------------|-------------|-------------|------------|
| Bees, Wasps and Ants Recording Society                        | 2021        | 1381        | 26         |
| Sussex Biodiversity Records Centre                            | 82          | 59          | 138 *      |
| Worcestershire Biological Records Centre                      | 48          | 54          | 41         |
| Bedfordshire and Luton Biodiversity Recording and Mon. Centre | 38          | 94          | 60         |
| Suffolk Biological Records Centre                             | 38          | 32          | 14         |
| Essex Field Club                                              | 34          | 54          | 139 *      |
| Greenspace Information for Greater London                     | 32          | 9           | 65 *       |
| Norfolk Biodiversity Information Service                      | 13          | 100         | 31         |
| Wiltshire and Swindon Biological Records Centre               | 6           | 15          | 3          |
| Staffordshire Ecological Record                               | 5           | 52          | 44         |
| Bristol Regional Environmental Records Centre                 | 4           | 35          | 13         |
| Royal Horticultural Society                                   | 4           | 1           | 0          |
| Shropshire Ecological Data Network                            | 4           | 47          | 11         |
| Rotherham Biological Records Centre                           | 3           | 34          | 77         |
| Sheffield Biological Records Centre                           | 2           | 19          | 9          |
| Highland Biological Recording Group                           | 1           | 0           | 0          |
| Leicestershire and Rutland Environmental Records Centre       | 1           | 0           | 0          |
| Birmingham EcoRecord                                          | 0           | 0           | 1          |
| Cambridgeshire & Peterborough Environmental Records Centre    | 0           | 2           | 0          |
| Cheshire RECORD                                               | 0           | 96          | 33         |
| Cumbria Biodiversity Data Centre                              | 0           | 13          | 48 *       |
| Environmental Records Information Centre North East           | 0           | 14          | 20         |
| Gloucestershire Centre for Environmental Records              | 0           | 2           | 2          |
| Herefordshire Biological Records Centre                       | 0           | 7           | 3          |
| Herts Environmental Records Centre                            | 0           | 0           | 2          |
| Lancashire Environmental Record Network                       | 0           | 5           | 40         |
| Merseyside Biobank                                            | 0           | 56          | 21         |
| National Trust                                                | 0           | 11          | 12         |
| North & East Yorkshire Ecological Data Centre                 | 0           | 0           | 1          |
| Open Mosaic Habitat Survey Group                              | 0           | 8           | 0          |
| Yorkshire Wildlife Trust                                      | 0           | 0           | 1          |
| <b>TOTAL</b>                                                  | <b>2336</b> | <b>2200</b> | <b>855</b> |

**Table S3** Numbers of tree bumblebee records held by the Bees, Wasps and Ants Recording Society (BWARS) obtained directly from them on 25/2/2015. The table unfolds some of the complexities of biological recording and record flows. For example, tree bumblebee records on BeeWatch were passed on to BWARS only in January 2015 (to contribute to their dedicated mapping project) and thus will likely be offered (by BWARS) to the NBN in February 2016. BWARS held only two years of OPAL data because the other two years were processed by one of the authors (AR) for this paper and were offered to the society only in June 2015. Whilst more than 70% of BWARS records (Total – BeeWatch records) had materialised through ‘naturalist recording’, lay records had also been provided to them; this included both miscellaneous records and all submissions through iSpot and iRecord. With BeeWatch and OPAL now also providing their tree bumblebee records to BWARS –because of its species mapping project and central role as verifier – the character of the data the Society offers to the NBN is gradually changing from merely naturalist-based to mixed naturalist and lay contributions. \*Records excluded for making Fig. 8b – see methods for details

| <b>Data type and source</b> | <b>2011</b> | <b>2012</b> | <b>2013</b> | <b>2014</b> | <b>TOTAL</b> |
|-----------------------------|-------------|-------------|-------------|-------------|--------------|
| <i>Naturalist recording</i> |             |             |             |             |              |
| Single species survey       | 13          | 512         | 618         | 1281        | 2424         |
| Field records               | 903         | 415         | 224         | 197         | 1739         |
| BBCT BeeWalk scheme         | 0           | 0           | 254         | 450         | 704          |
| <i>Subtotal</i>             | 916         | 927         | 1096        | 1928        | 4867         |
| <i>Lay recording</i>        |             |             |             |             |              |
| BeeWatch*                   | 22          | 242         | 426         | 502         | 1192         |
| OPAL*                       | 61          | 105         | 0           | 0           | 166          |
| Miscellaneous               | 716         | 601         | 3           | 24          | 1344         |
| iSpot/iRecord               | 31          | 29          | 106         | 261         | 427          |
| <i>Subtotal</i>             | 830         | 977         | 535         | 787         | 3129         |

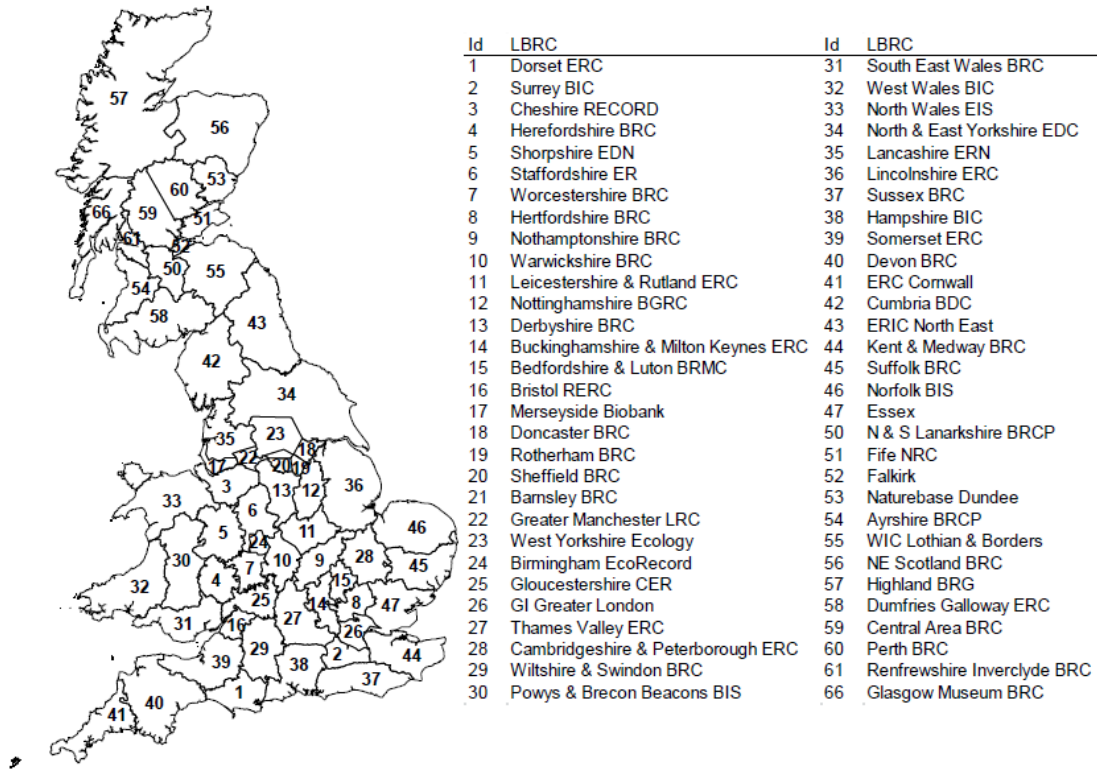

**Fig. S1** Map of mainland UK showing the geographic areas covered by individual Local Records Centres (LRCs). Each mainland UK LRC is indicated by a number on the map and identified in the list. Missing numbers (48, 49, 62-65) refer to LRCs located on offshore UK islands, which were not included in this study (and records from those places were thus not included in any of the figures in this paper). Most of the current LRCs follow Watsonian vice-county boundaries, a mapping system devised in the 19<sup>th</sup> century to record plant distributions throughout the UK (Watson 1852)

## References

Watson, H.C. 1852. *Cybele Britannica; or, British plants and their geographical relations*, 3rd edn. London: Longman.
